# Supplementary material
Source: publisher figshare collection journal article supplement (https://sage.figshare.com/ndownloader/files/14375768)
Supplement: Supplementary file 1 [file 14375768]

**Supplementary Table. Sample Characteristics at Baseline by Inclusion and Exclusion**

|                                                          | Included<br><i>n</i> = 123 |      | Excluded*<br><i>n</i> = 47 |      | <i>p</i> <sup>a</sup> | $\chi^2$ / <i>F</i> <sup>b</sup> |
|----------------------------------------------------------|----------------------------|------|----------------------------|------|-----------------------|----------------------------------|
| Sex (% , <i>n</i> ) <sup>a</sup>                         |                            |      |                            |      |                       |                                  |
| Women (% within column)                                  | 49.6                       | 61   | 55.3                       | 26   | .504                  | 0.446                            |
| Men (% within column)                                    | 50.4                       | 62   | 44.7                       | 21   |                       |                                  |
| Age ( <i>n</i> =170) (mean, SD) <sup>b</sup>             | 32.3                       | 9.5  | 33.0                       | 11.1 | .682 <sup>b</sup>     | 2.394                            |
| Body weight (kg) <sup>b</sup>                            | 77.1                       | 15.8 | 78.1                       | 20.3 | .753 <sup>b</sup>     | 3.857                            |
| Body mass index (kg/m <sup>2</sup> ) <sup>b</sup>        | 25.3                       | 4.7  | 26.0                       | 5.8  | .501 <sup>b</sup>     | 3.971                            |
| Years of education <sup>b</sup>                          | 11.1                       | 2.3  | 10.1                       | 1.6  | .074 <sup>b</sup>     | 5.163                            |
| Achieved educational level <sup>c</sup>                  |                            |      |                            |      |                       |                                  |
| Not fulfilled compulsory school                          | 5.7                        | 7    | 6.4                        | 3    | .360 <sup>c</sup>     | 3.211                            |
| Lower educational level (compulsory school)              | 47.2                       | 58   | 51.1                       | 24   |                       |                                  |
| High school                                              | 36.6                       | 45   | 40.4                       | 19   |                       |                                  |
| University (3-6 year)                                    | 10.6                       | 13   | 2.1                        | 1    |                       |                                  |
| Living and marital status <sup>a</sup>                   |                            |      |                            |      |                       |                                  |
| Single/living alone                                      | 39.8                       | 49   | 39.0                       | 14   | .302                  | 2.398                            |
| Married/cohabiting partnership                           | 38.2                       | 47   | 40.3                       | 24   |                       |                                  |
| Living with parents or other caregivers                  | 22.0                       | 27   | 20.8                       | 9    |                       |                                  |
| Parents educational level <sup>a</sup>                   |                            |      |                            |      |                       |                                  |
| Mothers level of education ( <i>n</i> =140)              |                            |      |                            |      |                       |                                  |
| Lower educational level                                  | 44.7                       | 46   | 44.7                       | 17   | .941                  | 0.398                            |
| Senior high school                                       | 39.8                       | 41   | 39.5                       | 15   |                       |                                  |
| University                                               | 14.6                       | 15   | 15.8                       | 6    |                       |                                  |
| Fathers level of education ( <i>n</i> =133) <sup>a</sup> |                            |      |                            |      |                       |                                  |
| Lower educational level                                  | 21.0                       | 21   | 20.6                       | 7    | .372                  | 3.133                            |
| Senior high school                                       | 58.0                       | 58   | 52.9                       | 18   |                       |                                  |
| University                                               | 21.0                       | 21   | 23.5                       | 8    |                       |                                  |
| Vocational status ( <i>n</i> =169) <sup>c</sup>          |                            |      |                            |      |                       |                                  |
| Unemployed or work disabled                              | 60.7                       | 74   | 63.8                       | 30   | .894 <sup>c</sup>     | 0.225                            |
| Part time work                                           | 5.7                        | 7    | 4.3                        | 2    |                       |                                  |
| Full time work                                           | 33.6                       | 41   | 31.9                       | 15   |                       |                                  |
| Severity of ADHD (by the CGI-S) <sup>d, a</sup>          |                            |      |                            |      |                       |                                  |
| High severity (CGI-S $\geq$ 5)                           | 55.3                       | 68   | 48.9                       | 23   | .458                  | 0.551                            |
| Lower severity (CGI-S < 5)                               | 44.7                       | 55   | 51.1                       | 24   |                       |                                  |
| DSM-IV subgroups of ADHD <sup>c</sup>                    |                            |      |                            |      |                       |                                  |
| ADHD-Inattentive                                         | 44.7                       | 55   | 25.5                       | 12   | .104 <sup>c</sup>     | 6.169                            |
| ADHD-Combined                                            | 39.0                       | 48   | 57.4                       | 27   |                       |                                  |
| ADHD-Hyperactive                                         | 8.1                        | 10   | 6.4                        | 3    |                       |                                  |
| ADHD-Residual/Other                                      | 8.1                        | 10   | 10.6                       | 5    |                       |                                  |
| Psychiatric comorbidity <sup>e, a</sup>                  |                            |      |                            |      |                       |                                  |
| Any mood disorder (lifetime)                             | 48.8                       | 60   | 59.6                       | 28   | .208                  | 1.587                            |
| Anxiety disorder                                         | 53.7                       | 66   | 46.8                       | 22   | .424                  | 0.639                            |
| Alcohol use disorder                                     | 12.2                       | 15   | 10.6                       | 5    | .778                  | 0.079                            |
| Drug use disorder                                        | 4.9                        | 6    | 12.8                       | 6    | .073                  | 3.225                            |

\* *N* = 170 patients were assessed for eligibility, however data from patients with only one registration on the Conners' continuous performance test II, Version 5 for Windows (CCPT II V.5), 2004 Multi-Health Systems Inc., were useless for analyses of treatment changes, and excluded (*n* = 6) from the study. Due to validity requirements patients with three or more consecutive missing responses from any CCPT II registrations were also excluded (*n* = 30). Further, those not medicated during the six weeks treatment period (*n* = 11) were excluded, leaving *n* = 123 participants for the study. a. Test by Pearson chi-square, 2-sided. b. Independent *t* test, 2-sided. c. Fisher's Exact Test, 2-sided. d. The Clinical Global Impression - Severity scale (CGI-S). e. Psychiatric comorbidity assessed by the Mini International Neuropsychiatric Interview for DSM-IV (MINI), last year if not otherwise specified.
